# Supplementary material
Source: PubMed Central journal article supplement (PMC2577725)
Supplement: supp_178_9_902__1.pdf [file supp_178_9_902__1.pdf]

**AIRWAY BYPASS IMPROVES THE MECHANICAL PROPERTIES  
OF EXPLANTED EMPHYSEMATOUS LUNGS**

Cliff K. Choong, Peter T. Macklem, John A. Pierce, Nitin Das,

Barbara A. Lutey, Carlo O. Martinez, Joel D. Cooper

**ONLINE DATA SUPPLEMENT**

Our laboratory demonstrated that lungs with severe emphysema empty more rapidly following inflation and by a greater volume after airway bypass (stent-supported transbronchial fenestrations) [E1]. The marked increase of collateral ventilation documented in emphysematous lungs by others [E2-E6] was confirmed by imaging hyperpolarized helium with transpleural ventilation [E7]. We designed a protocol to elucidate additional alterations in the pathophysiology of emphysema induced by transbronchial stents (airway bypass).

## **METHODS AND RESULTS**

This report describes results from 10 of 21 lungs designated for study. Four lungs were not suitable most often because of an inadequate bronchial stump. Seven lungs were not studied successfully because we were not able to place the transbronchial stents. The 10 lungs studied derive from 8 patients whose mean preoperative pulmonary function results are shown in Table E1. Presented for comparison with other series, these results are typical of patients who receive lung transplants at this center. Radiographic examinations included routine PA and lateral chest radiographs, computed tomography of the chest often with contrast, and ventilation perfusion scans. All subjects were reported to have bilateral hyperinflation of the lungs with severe or advanced panacinar or centrilobular emphysema. The disease predominantly involved the upper lobes in 6 of the 8 patients. Ventilation and perfusion scans were usually patchy and irregular on both wash-in and wash-out phases. Bullous disease was reported in 4 patients and asymmetrical disease defined as unilateral imbalance of at least 2/3 ventilation and perfusion occurred in 3. Anatomic pathology confirmed the presence of advanced or severe emphysema in every instance.

**TABLE E1. MEAN PREOPERATIVE PULMONARY FUNCTION STUDIES (N=8)**

|        | FVC     | FEV1    | RV       | TLC      | Raw cm/L/s |
|--------|---------|---------|----------|----------|------------|
| L/%    | 1.64/45 | 0.47/16 | 6.98/337 | 8.62/144 | 6.46/417   |
| SD L/% | 0.65/15 | 0.13/4  | 0.99/50  | 1.14/12  | 4.87/327   |

Abbreviations: FVC, forced vital capacity; FEV1, forced expiratory volume in one second; RV, residual volume; TLC, total lung capacity; Raw, airway resistance; cm/L/s, centimeters water/liter/second; L, liters; %, percent of predicted normal; SD, standard deviation

The lungs were stored in a plastic bag on ice for transport from the operating room. The bronchus was cleared of mucus by suctioning with a few ml of isotonic sodium chloride solution. Each lung was weighed and served as its own control. The main bronchus was anastomosed with continuous suture to an appropriately sized polytetrafluoroethylene vascular prosthesis as described in previous publications (E1, E7). Additionally, we everted a small (2 mm) prosthesis cuff in order to suture through the cuff and the bronchus and avoid leaving puncture sites on the exposed surface of the prosthesis. Finally, we covered the porous prosthesis and the anastomotic site with a finger segment cut from a rubber glove and placed a tiny drop of tissue cement between the glove segment and the prosthesis to obtain an airtight conduit.

The study of severely emphysematous lungs *ex vivo* is impaired by air leaks. These were detected by inflating the completely immersed lung in sodium chloride solution. Leaks appeared most often in the perihilar region and were repaired by focal ligation or application of a small latex (glove) patch coated lightly with tissue cement. During the experiment it was often difficult to detect the appearance of a new leak that needed repair. Furthermore, in sharp contrast, to healthy lungs, the airways in severe emphysema do not close at any specifically

predictable time on deflation. Zero flow is problematic since such lungs may continue to deflate slowly, often for well over a minute. This leads to a haunting and persistent uncertainty about the precise level of inflation of explanted emphysematous lungs.

Full inflation of the lung to ETLC was achieved principally with short bursts of pressure delivered manually from a collapsible respirator bag. We employed additionally, only gentle massage and repeated filling-emptying cycles. Following full inflation, the bronchus was open to the room for 5 minutes before minimal volume (ERV) was measured in a vertically walled 6.2 L plastic box (11.8 x 18.5 x 29 cm) that contained 2 L of isotonic sodium chloride solution. The deflated lung was floated on the saline. A rigid top with a round central opening to accommodate the bronchus was placed on top of the lung. The top fit snugly inside the walls of the box. The lung was completely immersed by pressing down and carefully leveling the top. This allowed placement of a mark on the side of the box. From this mark we were able to measure the displaced liquid volume. The weight of the lung in grams was subtracted from the displaced volume of liquid in milliliters to estimate the volume of trapped gas in milliliters. Replicate measurements on the same lung were reproducible. But the numerical values reported for ERV could be erroneously low because the bronchial connector was not occluded prior to complete immersion of the lung. Thus, the lung was subjected to the positive pressure of immersion (2-3 cm water) that would have forced air out of the lung if any lung parenchyma communicated with the airway opening at theoretical zero transpulmonary pressure. This possibility would be greater following than prior to airway bypass. The immersion, however, was brief (less than one minute in most instances) and a large error seems quite unlikely. The gross appearance of the lungs following airway bypass is illustrated in Figure 1.

Table E2 presents the data on lung weights and compartmental volumes.

**TABLE E2. LUNG WEIGHT AND COMPARTMENTS VOLUME**

| Lung # |      | Weight (g) | ERV (L) | EVC    |
|--------|------|------------|---------|--------|
| 1      | PRE  | 300        | 2.35    | 1.49   |
|        | POST |            | 0.9     | 2.49   |
| 2      | PRE  | 350        | 2.95    | 0.73   |
|        | POST |            | 1.49    | 1.96   |
| 3      | PRE  | 370        | 2.30    | 0.99   |
|        | POST |            | 1.60    | 2.05   |
| 4      | PRE  | 518        | 2.34    | 1.46   |
|        | POST |            | 1.04    | 2.60   |
| 5      | PRE  | 320        | 3.25    | 1.30   |
|        | POST |            | 0.75    | 2.95   |
| 6      | PRE  | 462        | 2.84    | 0.87   |
|        | POST |            | 0.94    | 2.10   |
| 7      | PRE  | 373        | 2.48    | 0.75   |
|        | POST |            | 0.93    | 1.96   |
| 8      | PRE  | 324        | 1.63    | 0.71   |
|        | POST |            | 0.23    | 2.26   |
| 9      | PRE  | 468        | 2.85    | 0.67   |
|        | POST |            | 0.91    | 2.80   |
| 10     | PRE  | 240        | 2.01    | 0.87   |
|        | POST |            | 0.84    | 1.62   |
| Mean   | PRE  | 373        | 2.50*   | 0.98** |
|        | POST |            | 0.96*   | 2.28** |
| SD     | PRE  | 86         | 0.48    | 0.32   |
|        | POST |            | 0.38    | 0.42   |

\*p<0.001

\*\*p<0.001

Maximal expiratory flow-volume (EMEFV) curves were measured by inflating the lung to roughly +10 cm water transpulmonary pressure with a syringe, pausing a few seconds, and opening the bronchus with a solenoid valve to a 55 gallon barrel previously adjusted to a pressure of -10 cm water. The pneumotachograph (RSS100-HR, sensor model: 3700, flow range: 0 to 160 L/min; Hans Rudolph, Kansas City, MO) together with commercial software (RSS-HR Research Pneumotach System version 3.07b; Korr Medical Technologies, Salt Lake City, UT) was placed on a port to connect the interior of the plexiglass chamber with room air.

Under these circumstances the chamber became a variable flow plethysmograph. During EMEFV curves the pneumotachograph measured forced expiratory flow, while its integral measured expired volume.

The question arose whether minus 10 cm water pressure is adequate to produce maximal rates of expiratory flow from emphysematous lungs. The fact that following peak flow at ~0.2 seconds after exposing the lung to -10 cm water, the flow abruptly decreased in spite of a constant negative pressure in the large reservoir is strong evidence that expiratory flow was limited by dynamic airway compression. The pleural pressure required to limit flow in patients with emphysema is substantially less than in normal lungs (E8, E9) and decreases systematically with lung volume. In excised lungs it is even less because there is no upper airway to maintain tracheal pressure greater than the pressure at the airway opening. Thus at the instant that the bronchus was exposed to the reservoir pressure it was dynamically compressed by 10 cm water. This is sufficient to limit expiratory flow (E10-E12) so we are confident that maximal expiratory was achieved in all lungs studied. Table E3 presents the numerical data on EMEFV curves.

**TABLE E3. EXPLANTED MAXIMAL EXPIRATORY FLOW-VOLUME CURVES**

\* = mean value

| Lung # |       | 1 sec | 5 sec | 10 sec | 20 sec | Total | t to end (sec) |
|--------|-------|-------|-------|--------|--------|-------|----------------|
| 1      | *PRE  | 156   | 434   | 591    | 813    | 1494  | 72             |
|        | *POST | 151   | 671   | 1122   | 1854   | 2296  | 49             |
| 2      | *PRE  | 118   | 304   | 410    | 520    | 641   | 44             |
|        | *POST | 141   | 361   | 804    | 1116   | 1638  | 66             |
| 3      | *PRE  | 83    | 288   | 452    | 810    | 1125  | 60             |
|        | *POST | 258   | 813   | 1203   | 1678   | 1678  | 59             |
| 4      | *PRE  | 133   | 428   | 658    | 977    | 1898  | 62             |
|        | *POST | 383   | 939   | 1307   | 1730   | 2689  | 60             |
| 5      | *PRE  | 95    | 186   | 262    | 346    | 418   | 62             |
|        | *POST | 295   | 973   | 1424   | 1945   | 3116  | 53             |
| 6      | *PRE  | 36    | 128   | 209    | 320    | 536   | 60             |
|        | *POST | 399   | 1354  | 1832   | 2232   | 2517  | 46             |
| 7      | *PRE  | 264   | 581   | 793    | 1045   | 1043  | 37             |
|        | *POST | 286   | 1069  | 1559   | 2141   | 2352  | 43             |
| 8      | *PRE  | 139   | 388   | 532    | 660    | 710   | 48             |
|        | *POST | 442   | 1139  | 1473   | 1758   | 2252  | 51             |
| 9      | *PRE  | 35    | 108   | 188    | 314    | 635   | 89             |
|        | *POST | 207   | 878   | 1462   | 2128   | 3008  | 69             |
| 10     | *PRE  | 116   | 303   | 512    | 652    | 828   | 73             |
|        | *POST | 194   | 581   | 844    | 1120   | 1532  | 62             |

Explanted emphysematous lungs are easily inflated to volumes greater than that of the original thorax. Accordingly, the volume of inflation employed to measure the pressure volume diagrams was monitored to avoid the risk of structural damage due to hyperinflation. This contrasts with assessment of the EMEFV curves where all lungs were inflated to a pressure of 10 cm water before measurement of the flow volume curve. Yet the mean results between the EMEFV and pressure volume measurements of EVC before bypass were closely similar (within 8%). Following bypass, mean EVC was 0.4 L (19%) greater from EMEFV curves than from pressure volume data.

The slope of the static pressure volume curve or static compliance was measured as the slope of the tangent to the curve at 40% EVC on the deflation limb of the static pressure volume curve (E13). Data are included for only 9 of the lungs since the data for lung #10 were lost. When there is progressive air trapping during lung deflation, the volume of communicating airspaces decreases progressively. This tends to decrease static compliance and linearize the deflation static pressure volume curve so the lung volume at zero transpulmonary pressure, ERV, is large. The lung volume where air trapping starts is the volume at which the slope of the post-bypass deflation pressure volume curve increases while the pre-bypass slope remains relatively low. This generally occurred at high lung volumes. Thus airway bypass revealed the true hypercompliant nature of the severely emphysematous lung parenchyma that was masked by progressive air trapping before the bypass procedure. The steep deflation slope post bypass allowed for more gas to leave the lung before zero transpulmonary pressure was reached; as a result ERV decreased. The results shown in Table E4 are variable, but the pattern shows significant increases in static compliance following airway bypass.



**TABLE E4. STATIC COMPLIANCE**

|        |      |        |
|--------|------|--------|
| Lung # |      |        |
| 1      | PRE  | 441    |
|        | POST | 667    |
| 2      | PRE  | 578    |
|        | POST | 1515   |
| 3      | PRE  | 562    |
|        | POST | 769    |
| 4      | PRE  | 740    |
|        | POST | 869    |
| 5      | PRE  |        |
|        | POST | 666    |
| 6      | PRE  | 834    |
|        | POST | 1176   |
| 7      | PRE  | 500    |
|        | POST | 1429   |
| 8      | PRE  | 648    |
|        | POST | 580    |
| 9      | PRE  | 430    |
|        | POST | 1650   |
| Mean   | PRE  | 591*   |
|        | POST | 1035** |
| SD     | PRE  | 143    |
|        | POST | 412    |

\*p<0.001

\*\*p=0.008

Expiratory rates of flow for each lung were matched with static elastic recoil pressure at identical lung volumes. This was done at four different levels of inflation. The static recoil pressure was divided by maximal expiratory flow to obtain the airway resistance upstream from equal pressure points, which is the uncompressed segment of the tracheobronchial tree (E14). The mean data for each lung are presented in Table E5.

**TABLE E5. EXPLANTED MAXIMAL EX FLOW STATIC RECOIL CM  
WATER/L/SEC**

| Lung # |      | A   | B    | C    | D   | Mean |
|--------|------|-----|------|------|-----|------|
| 1      | Pre  | 24  | 21   | 30   | 23  | 24.5 |
|        | Post | 17  | 22   | 19   | 19  | 19   |
| 2      | Pre  | 46  | 52   | 40   | 20  | 39.5 |
|        | Post | 33  | 28   | 20   | 13  | 23.5 |
| 3      | Pre  | 26  | 32   | 35   | 208 | 75   |
|        | Post | 9.2 | 7.1  | 5.8  | 23  | 11.3 |
| 4      | Pre  | 39  | 29   | 32   | 22  | 30.5 |
|        | Post | 9.6 | 12.8 | 13.5 | 4.8 | 10   |
| 5      | Pre  | 58  | 38   | 32   | 45  | 43   |
|        | Post | 9.4 | 5.0  | 4.3  | 3.6 | 5.6  |
| 6      | Pre  | 86  | 92   | 92   | 93  | 91   |
|        | Post | 8.1 | 2.1  | 2.3  | 4.3 | 4.2  |
| 7      | Pre  | 11  | 13   | 14   | 11  | 12.3 |
|        | Post | 5.3 | 3    | 4    | 5   | 4.3  |
| 8      | Pre  | 54  | 52   | 73   | 46  | 56   |
|        | Post | 12  | 8.6  | 1.2  | 0.8 | 5.7  |
| 9      | Pre  | 128 | 132  | 96   | 46  | 101  |
|        | post | 13  | 4.6  | 3.0  | 10  | 7.7  |

A-D Levels of lung inflation

| Pre - control                    | Overall mean |
|----------------------------------|--------------|
| Post – following stent placement | Pre 52.5     |
|                                  | Post 10      |

## DISCUSSION

Fletcher and Peto characterized the natural history of emphysema by a progressively accelerating decline in FEV<sub>1</sub> over the years (E15). Because a good part of this decline is due to a progressive reduction in VC secondary to gas trapping, an alternative view of the natural history of this disease is a progressive increase in gas trapping. The schematic in Figure E1 shows that RV increased over three fold while TLC expanded less than 50% and VC decreased slightly more than 50%. This puts the decrease in FEV<sub>1</sub> in the perspective of resulting from gas trapping. But the decrease in VC only mandates a fall in FEV<sub>1</sub> if the FEV<sub>1</sub>/FVC does not increase (E16).

The remainder of the fall in FEV<sub>1</sub> is due to both the loss of lung elastic recoil a *sine qua non* of emphysema (E17) and the obstruction in small airways that characterizes chronic obstructive pulmonary disease (E18). Both of these abnormalities, in turn, are presumably the proximate cause of gas trapping. Loss of lung elastic recoil leads to loss of small airway support through radial traction at progressively higher lung volumes, while anatomical changes in the small airways render these airways more susceptible to closure.

The most important observation in the present study is the marked reduction of trapped gas residual volume effected by airway bypass. We believe bypass accounts for the increased flow and volume of emptying reported earlier by Lausberg and associates [1], and confirmed in this study.

## REFERENCES

- E1. Lausberg HF, Chino K, Patterson GA, Meyers BF, Toeniskoetter PD, Cooper JD. Bronchial fenestration improves expiratory flow in emphysematous human lungs. *Ann Thorac Surg* 2003;75:393-397.
- E2. Hogg JC, Macklem PT, Thurlbeck WM. The resistance of collateral channels in excised human lungs. *J Clin Invest* 1969;48:421-431.
- E3. Menkes HA, Traystman RJ. Collateral ventilation. *Am Rev Resp Dis* 1977;116:287-309.
- E4. Terry PB, Traystman RJ, Newball HH, Batra G, Menkes HA. Collateral ventilation in man. *N Engl J Med* 1978;298:10-15.
- E5. Rosenberg DE, Lyons HA. Collateral ventilation in excised human lungs. *Respiration* 1979;37:125-134.
- E6. Morrell NW, Wignall BK, Biggs T, Seed WA. Collateral ventilation and gas exchange in emphysema. *Am J Resp Crit Care Med* 1994;150:635-641.

- E7. Choong CK, Macklem PT, Pierce JA, Lefrak SS, Woods JC, Conradi MS, Yablonskiy DA, Hogg JC, Chino K, Cooper JD. Transpleural ventilation of explanted human lungs. *Thorax* 2007;62:623-630.
- E8. Potter WA, Olafsson S, Hyatt RE. Ventilatory mechanics and expiratory flow limitation during exercise in patients with obstructive lung disease. *J Clin Invest.* 1971 ;50:910-919.
- E9. Campbell EJ, Martin HB, Riley RL. Mechanisms of airway obstruction. *Bull Johns Hopkins Hosp.* 1957;101:329-343
- E10. Macklem PT, Fraser RG, Bates DV. Bronchial pressures and dimensions in health and obstructive airway disease. *J Appl Physiol.* 1963; 18:699-706,
- E11 Macklem PT, Fraser RG, Brown WG..Bronchial pressure measurements in emphysema and bronchitis. *J Clin Invest.* 1965;44:897-905.
- E12 Macklem PT, Wilson NJ.Measurement of intrabronchial pressure in man. *J Appl Physiol.* 1965;;6: 53-63.
- E13. Pierce JA, Ebert RV. The elastic properties of the lungs in the aged. *J Lab Clin Med* 1958;51:63-71.
- E14. Mead J, Lindgren I, Gaensler EA. The mechanical properties of the lungs in emphysema. *J Clin Invest* 1955;34:1005-1016.
- E15. Fletcher C, Peto R. The natural history of chronic airflow obstruction. *Br Med J* 1977; 6077:1645-1648.
- E16. Fessler HE, Scharf SM, Permitt S. Improvement in spirometry following lung volume reduction surgery. *Am J Respir Crit Care Med* 2002;165:34-40.
- E17. Mead J, Lindgren I, Gaensler EA. The mechanical properties of the lungs in emphysema. *J Clin Invest* 1955;34:1005-1016.

E18. Hogg JC, Macklem PT, Thurlbeck WM. Site and nature of airway obstruction in chronic obstructive lung disease. *N Engl J Med* 1968;278:1355-1360.

## **FIGURE LEGENDS**

Figure E1. Schematic characterization of the natural history of pulmonary emphysema (E15) with progressive increase in residual volume (RV) of 5.8 L (483%) while total lung capacity (TLC) increased 2.6 L (43%). Vital capacity (VC) decreased (to 45%) while functional residual capacity (FRC) increased (100%), and forced expiratory volume in one second was reduced to 12% of normal (data not shown). The mean age of our subjects at the time of lung studies was 61 years. The left ordinate displays data for a healthy young male subject. Data for the right ordinate closely approximate the mean preoperative pulmonary function results obtained in the patients of this study.

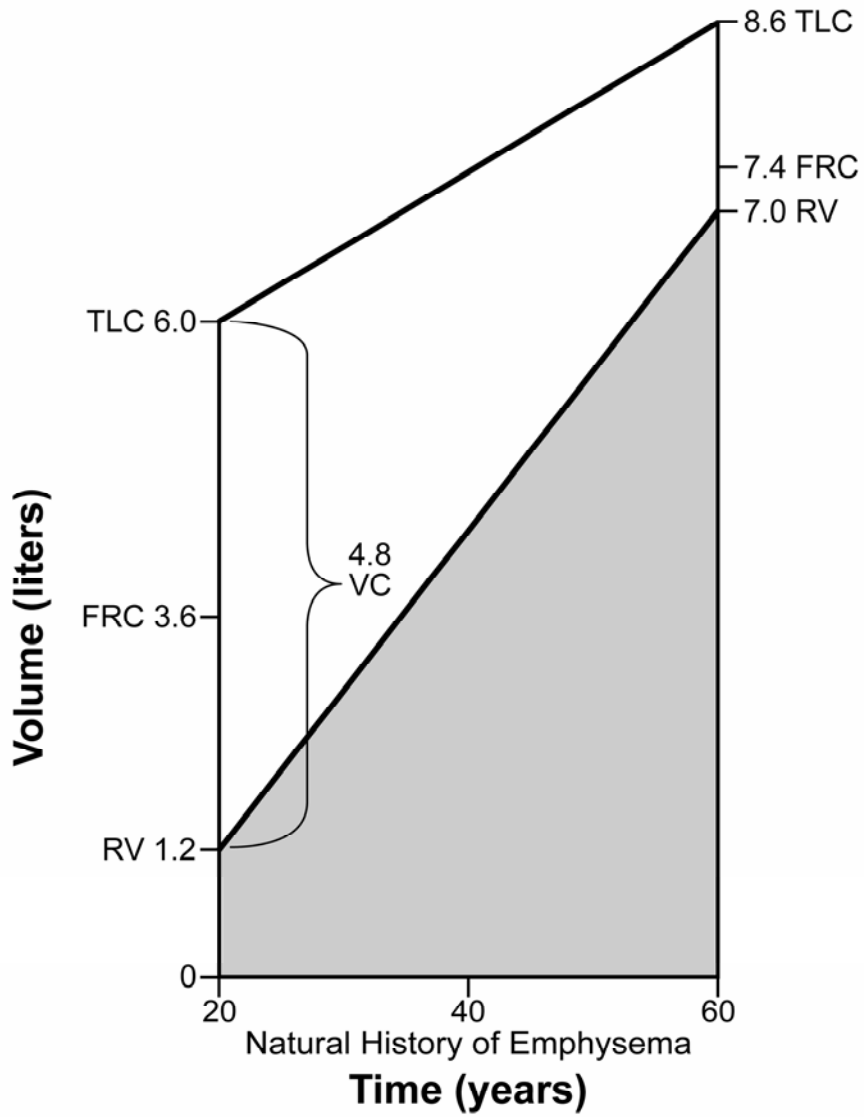

Figure E1
